# Supplementary material for: PaACL silencing accelerates flower senescence and changes the proteome to maintain metabolic homeostasis in Petunia hybrida
Source: PubMed Central journal article supplement (PMC7475263; doi:10.1093/jxb/eraa208), 2020-05-04
Supplement: eraa208_suppl_supplementary_tables_s1-s5.pdf [file eraa208_suppl_supplementary_tables_s1-s5.pdf]

**Table S1** Specific primer sequences used for full-length ACL gene isolation from *Petunia hybrida* 'Ultra'

| Gene           | Forward primer (5'→3')   | Reverse primer (5'→3')   |
|----------------|--------------------------|--------------------------|
| <i>PaACLA1</i> | ATGCCAGAAAGAAGATCAGAGAG  | TTATGCAGCTGCAGTGATGCACTC |
| <i>PaACLA2</i> | ATGGCAAGGAAGAAGATCAGAGAG | CTATGCTTCAGACATAATGCAATC |
| <i>PaACLB1</i> | ATGGCTACTGGACAACTTTTCTC  | TCACTGGTGTAGAGGACATCTT   |
| <i>PaACLB2</i> | ATGGCTACTGGACAGCTTTTCTC  | TCACTGGTGTAGAGAACGTCTTC  |

**Table S2** Primer sequences used in quantitative real-time PCR

| Gene            | Forward primer (5'→3')     | Reverse primer (5'→3')               |
|-----------------|----------------------------|--------------------------------------|
| <i>PaETR2</i>   | GCTTTGTTATCCGTTGCT<br>GA   | ATAATTCTCGGGATGTTCCA                 |
| <i>PaACO1</i>   | TGAATGGTGCTGAAAGA<br>G     | CATTACTTCATGTGGGATT                  |
| <i>PaACO4</i>   | CCCAAAGTACGCGGACT<br>C     | AAGCTGGTGCAGGATAAA                   |
| <i>PaACS9</i>   | CTGGTTTCGTGTATGTTT         | TGGCGTACTTTGCTGAT                    |
| <i>PaACS11</i>  | GAAGCAGAAGCCAACAA<br>C     | CAAGAATACCCTCAAGGA                   |
| <i>PaWRKY23</i> | TGAATACGCCATCAACAC         | CCAGCTACTACTTCTCCCT                  |
| <i>PaACLA1</i>  | AAACGCCTTGCTGCCATT<br>G    | CCACTCTTTCCACGCTTCCC                 |
| <i>PaACLA2</i>  | TGTTATTTGGGAAGCGTG<br>GA   | TCCGCCCATCTCCACCTC                   |
| <i>PaACLB1</i>  | CTGATTTTACGAGGAGG<br>GACAC | CTTAGTATTTGTTAGTGTGTGTAGTAA<br>TGGAA |
| <i>PaACLB2</i>  | TTCTCCAACAACCACCTA<br>ACTG | TTTGTGTTGCTTTGATGAAATAGAG            |
| <i>CYP</i>      | AGGCTCATCATTCCACCG<br>TGT  | TCATCTGCGAACTTAGCACCG                |
| <i>Actin</i>    | TGCTGATCGAATGAGCA<br>AGGAA | GGAGCAACAACCTTAATCTTC                |

**Table S3** Specific primer sequences used for VIGS vector construction

| Gene                         | Forward primer (5'→3')                                                                                          | Reverse primer (5'→3')                                                                      |
|------------------------------|-----------------------------------------------------------------------------------------------------------------|---------------------------------------------------------------------------------------------|
| <i>PaACLA1</i>               | ACGCGTGAGCTCGGTACCGG<br>ATCCCTCCGTTGATTGCTACT<br>CTG                                                            | TCTGTGAGTAAGGTTACCGAATTC<br>AGAACCTCCTCTTCATTTGG                                            |
| <i>PaACLA2</i>               | ACGCGTGAGCTCGGTACCGG<br>ATCCTCCAATTGAGGTCTAT<br>GGAC                                                            | TCTGTGAGTAAGGTTACCGAATTC<br>TGGACTTCATGCAGAAAGTGG                                           |
| <i>PaACLB1</i>               | ACGCGTGAGCTCGGTACCGG<br>ATCCAGCAGCCTTTGTACCGT<br>CACCC                                                          | TCTGTGAGTAAGGTTACCGAATTC<br>ATCATAAATGATAGCTGAGAG                                           |
| <i>PaACLB2</i>               | ACGCGTGAGCTCGGTACCGG<br>ATCCATCCAGCATTTTATCCA<br>AGTGT                                                          | TCTGTGAGTAAGGTTACCGAATTC<br>AGCTTTAAACCAGGTACAACAA                                          |
| <i>PaACLA1</i><br><i>-A2</i> | ACGCGTGAGCTCGGTACCGG<br>ATCCTCTATGCTGATACAGTA<br>GGTGA<br>AGAATGCACATCACTTGTTGC<br>CACTCTACCAT                  | GTGGCAACAAGTGATGTGCATTCT<br>AGCTGCTTTT<br>TCTGTGAGTAAGGTTACCGAATTC<br>CTCTGTAGCACTCATAACCCT |
| <i>PaACLB1</i><br><i>-B2</i> | ACGCGTGAGCTCGGTACCGG<br>ATCCCGATTGGTGGTGCTAT<br>TGATG<br>ACGCGTGAGCTCGGTACCGG<br>ATCCTCTATGCTGATACAGTA<br>GGTGA | ATACCACCAGATATTTCTGGCTTGG<br>TGAACATT<br>GTGGCAACAAGTGATGTGCATTCT<br>AGCTGCTTTT             |

**Table S4** The peptides expressed in *Escherichia coli* of three proteins, PamCS, PaPDC2 and PaGELP

| protein | Peptide sequence                                                                                                                                                                        |
|---------|-----------------------------------------------------------------------------------------------------------------------------------------------------------------------------------------|
| PamCS   | VPSKEQVDSLSQELQSRATIPDHVYKTIDALPVT AHPMTQFATGVMALQVQS<br>EFQKAEKGIHKS KLWEPTYEDSMSLIAQVPLVGAYVYRRMYKNGQTIPKDD<br>SLDYGANFAMLG YSSPDMHELMRLYVTIHS DHEGGNVA                               |
| PaPDC2  | NYTGLVD AIHNGEGNCWTTKVRCEEELVEAIETATGAKKDSL CFIEVIVHKD<br>DTSKELLEWGS RVSAANSRPPNPHFWFESHEGSIDTCKPTTNNVATLPTNNT<br>VTISTHTPSTTIIPC NSTTDST                                              |
| PaGELP  | QDSTTLVPAIITFGDS AVDVGNNNDYIHTLFKANYPPYGRDFVSHQPTGRFCN<br>GKLATDITADTLGFTTYPAAYLSPQASGKNLLIGTNFASAAAGYDDKTALN<br>HAIPLSQQMQFYKEYQSKLAKVAGSQKATSILKDALYIISAGSSDFLQNYIIN<br>PYINKIYTPDQYG |

**Table S5** Effects of *PaACLB1-B2* silencing on the plants and cell size

|                                                  | pTRV2        | pTRV2-PaB1-B2 |
|--------------------------------------------------|--------------|---------------|
| height of plant (cm)                             | 18.53 ± 1.01 | 12.45 ± 1.55* |
| Diameter of plant (cm)                           | 18.95 ± 0.97 | 13.71 ± 0.89* |
| height of Internode (cm)                         | 2.55 ± 0.57  | 0.51 ± 0.11*  |
| Length of young leaves (cm)                      | 2.13 ± 0.05  | 1.33 ± 0.05*  |
| Length of young leaves (cm)                      | 2.13 ± 0.05  | 1.33 ± 0.05*  |
| Length of pedicel (cm)                           | 2.86 ± 0.41  | 0.76 ± 0.09*  |
| Length of sepal (cm)                             | 2.35 ± 0.17  | 1.12 ± 0.15*  |
| Diameter of corolla (cm)                         | 7.85 ± 0.54  | 5.45 ± 0.62*  |
| Length of filaments (cm)                         | 3.86 ± 0.41  | 3.12 ± 0.15*  |
| Length of styles (cm)                            | 3.85 ± 0.06  | 3.09 ± 0.19*  |
| Diameter of stigma (mm)                          | 3.13 ± 0.05  | 1.95 ± 0.06*  |
| Diameter of leaves upper epidermal cells (µm)    | 41.22 ± 1.83 | 20.18 ± 1.14* |
| Diameter of leaves lower epidermal cells (µm)    | 42.84 ± 1.21 | 19.66 ± 1.17* |
| Length of guard cells (µm)                       | 20.51 ± 1.33 | 16.53 ± 1.61* |
| Diameter of petals upper epidermal cells (µm)    | 2.50 ± 0.11  | 1.58 ± 0.09*  |
| Diameter of petals lower epidermal cells (µm)    | 2.81 ± 0.12  | 2.24 ± 0.10 * |
| Wall thickness of mesophyll cells                | 0.30 ± 0.03  | 0.46 ± 0.02*  |
| Wall thickness of floral cells                   | 0.24 ± 0.02  | 0.59 ± 0.03*  |
| Wall thickness of flower adaxial epidermis cells | 1.8 ± 0.02   | 2.61 ± 0.02*  |

\* Data are means ± SE from 15 to 20 samples. Statistical analysis was performed using Student t test with 15 to 20 replicates. Asterisk means significant difference at P=0.05 level.
